# Supplementary material for: Transcriptional analysis of susceptible and resistant European corn borer strains and their response to Cry1F protoxin
Source: PubMed Central journal article supplement (PMC4518661; doi:10.1186/s12864-015-1751-6), 2015-07-29

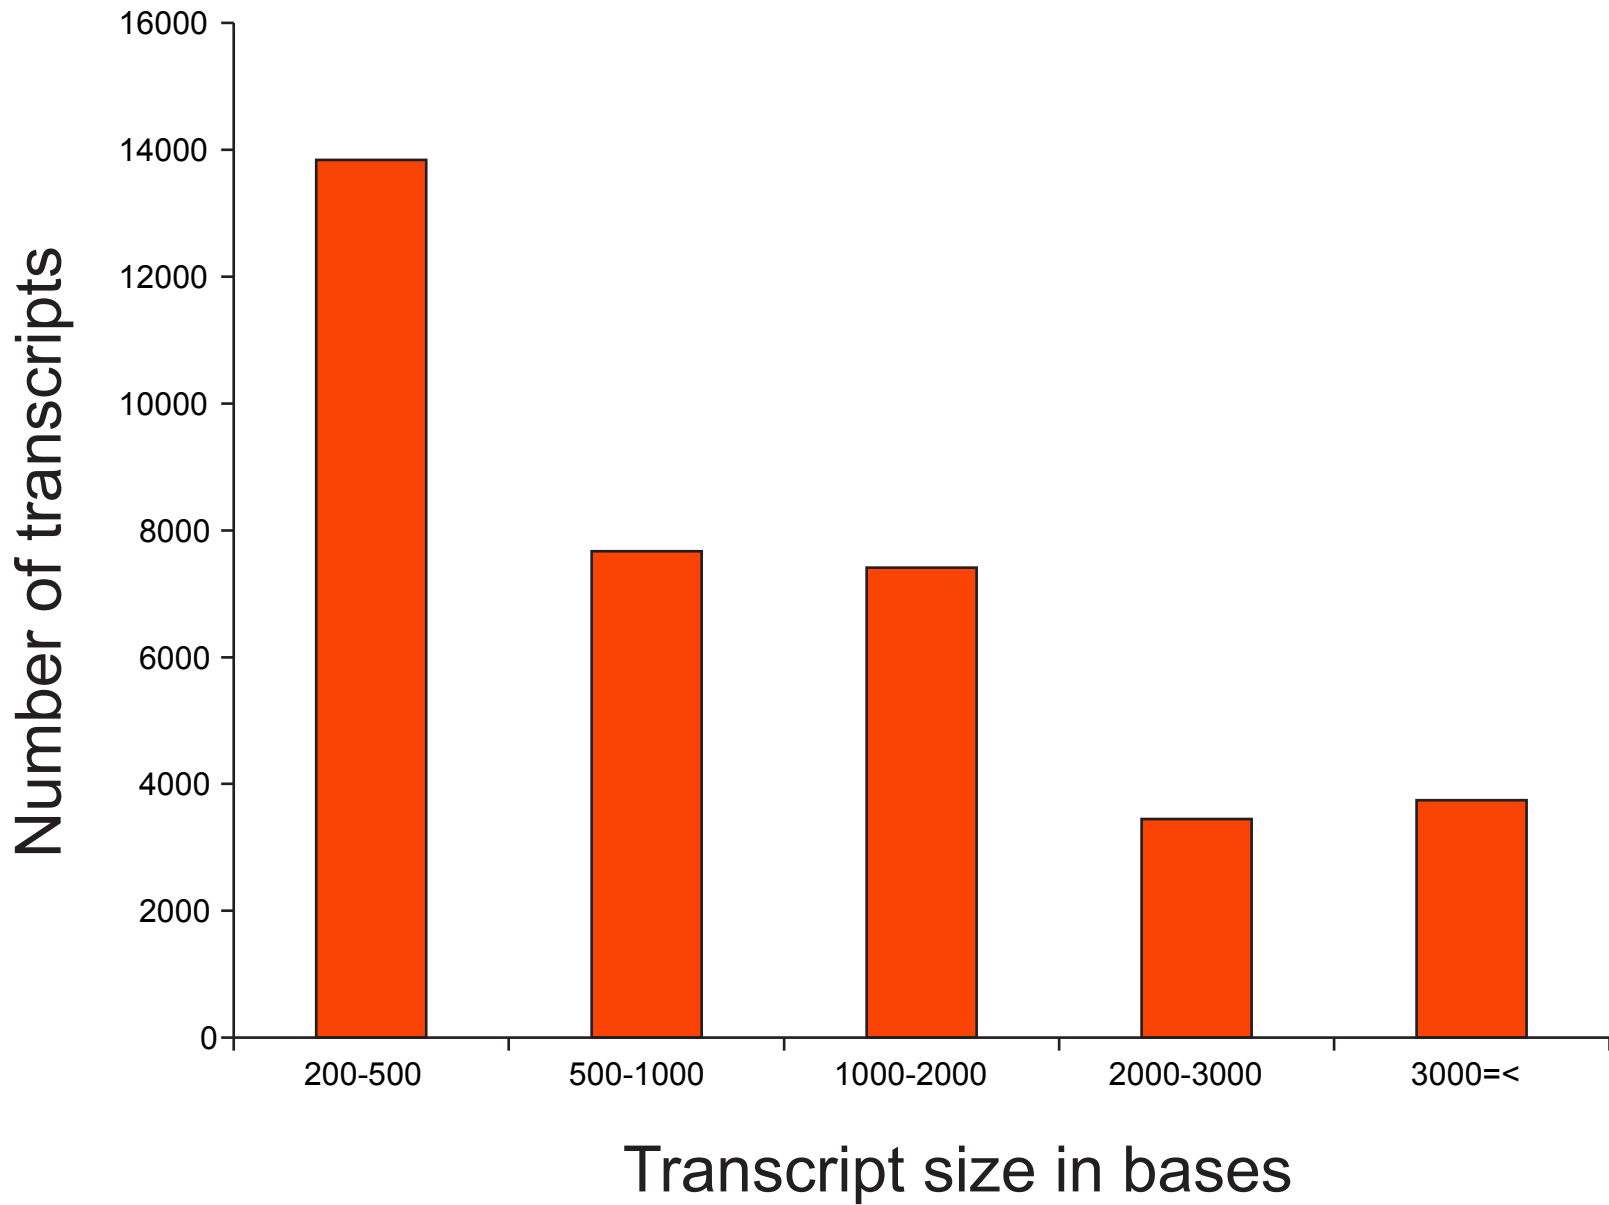

Supplement: 12864_2015_1751_MOESM1_ESM.pdf [file 12864_2015_1751_MOESM1_ESM.pdf]
